# Supplementary material for: Network Reconstruction and Modelling Made Reproducible with moped
Source: MDPI journal article supplement (doi:10.3390/metabo12040275), 2022-03-22
Supplement: s1 [file s1]

## Supplementary Material for Network reconstruction and modelling made reproducible with moped

Nima P. Saadat<sup>1</sup>, Marvin van Aalst<sup>1</sup>, and Oliver Ebenhöh<sup>1,2,+</sup>

<sup>1</sup> Institute of Theoretical and Quantitative Biology, University of Düsseldorf and CEPLAS-Cluster of Excellence on Plant Sciences, Düsseldorf, Germany

<sup>2</sup>Cluster of Excellence on Plant Sciences (CEPLAS), Heinrich-Heine-Universität Düsseldorf, Universitätsstraße 1, 40225 Düsseldorf, DE

<sup>+</sup>Correspondence to: [oliver.ebenhoeh@uni-duesseldorf.de](mailto:oliver.ebenhoeh@uni-duesseldorf.de)

# 1 Tables of Cofactor pairs

**Table S1:** Cofactor pairs of MetaCyc identifiers

| Strong Cofactor                  | Weak Cofactor                   |
|----------------------------------|---------------------------------|
| ATP                              | ADP                             |
| GTP                              | GDP                             |
| NADH                             | NAD                             |
| NADPH                            | NADP                            |
| 10-FORMYL-THF                    | THF                             |
| METHYLENE-THF                    | THF                             |
| 5-METHYL-THF                     | THF                             |
| ACETYL-COA                       | CO-A                            |
| Donor-H <sub>2</sub>             | Acceptor                        |
| Reduced-ferredoxins              | Oxidized-ferredoxins            |
| Red-NADPH-Hemoprotein-Reductases | Ox-NADPH-Hemoprotein-Reductases |
| Cytochromes-C-Reduced            | Cytochromes-C-Oxidized          |
| Plastocyanin-Reduced             | Oxidized-Plastocyanins          |
| ETF-Reduced                      | ETF-Oxidized                    |

|                 |                 |
|-----------------|-----------------|
| Red-Thioredoxin | Ox-Thioredoxin  |
| CPD-12829       | PLASTOQUINONE-9 |

**Table S2:** Cofactor pairs of BiGG identifiers

| <b>Strong cofactor</b> | <b>Weak Cofactor</b> |
|------------------------|----------------------|
| atp                    | adp                  |
| gtp                    | gdp                  |
| nadh                   | nad                  |
| nadph                  | nadp                 |
| 10fthf                 | thf                  |
| methf                  | thf                  |
| fdxrd                  | fdxox                |
| trdrd                  | trdox                |
| etfrd                  | etfox                |
| accoa                  | coa                  |
| pcrd                   | pcox                 |

## 2 Table of Biomass composition

The template biomass function in moped is a subset of all available compounds and respective stoichiometric coefficients from the established models iJO1366 and iML1515. We encourage users to design their own objective/biomass function in much needed manual curation steps.

**Table S3:** Default biomass composition

| Compound          | Stoichiometric coefficient |
|-------------------|----------------------------|
| TRP_c             | -0.055234                  |
| GLT_c             | -0.255712                  |
| MALONYL-COA_c     | -3.1e-05                   |
| GTP_c             | -0.209121                  |
| NADP_c            | -0.000112                  |
| WATER_c           | -48.752916                 |
| LEU_c             | -0.437778                  |
| ASN_c             | -0.234232                  |
| L-ASPARTATE_c     | -0.234232                  |
| L-ALPHA-ALANINE_c | -0.499149                  |
| ARG_c             | -0.28742                   |
| TYR_c             | -0.133993                  |
| THR_c             | -0.246506                  |
| CTP_c             | -0.129799                  |
| SER_c             | -0.209684                  |
| ATP_c             | -54.119975                 |
| GLN_c             | -0.255712                  |
| MET_c             | -0.149336                  |
| LYS_c             | -0.333448                  |

|              |           |
|--------------|-----------|
| ACETYL-COA_c | -0.000279 |
| CYS_c        | -0.088988 |
| HIS_c        | -0.092056 |
| VAL_c        | -0.411184 |
| UTP_c        | -0.140101 |
| ILE_c        | -0.282306 |
| NADPH_c      | -0.000335 |
| NAD_c        | -0.001787 |
| PRO_c        | -0.214798 |
| PHE_c        | -0.180021 |
| GLY_c        | -0.595297 |
| Pi_c         | 53.945874 |
| PROTON_c     | 51.472    |
| ADP_c        | 53.95     |

### 3 General Implementation and structure of Python object/classes

moped is a package fully integrated in the object-oriented programming language Python. The core is the `moped.Model` class, which instantiates a metabolic network from scratch or from input files like SBML or pathway/genome database (PGDB) flat files. This class includes reactions and compounds, which contain all extracted information for the respective attributes of the metabolic network. The `moped.analysis` module includes the module `moped.analysis.blast`, which constructs a `moped.Model` from all reactions in the MetaCyc database that can be found within genome/proteome sequences using BLAST and GPR rules. For this, `moped` requires FASTA files as input (genome or proteome), and parameters for BLAST can be specified. The module `moped.analysis.gapfilling` allows gap-filling via Meneco using one `moped.Model` object as the draft network and another one as the repair network. The last module, `moped.analysis.scope` provides topological analysis of `moped.Model` objects using metabolic network expansion. The core classes are displayed in an unified modelling language graph in Figure 1. `moped` can be installed using `pip install moped==1.9.3`.

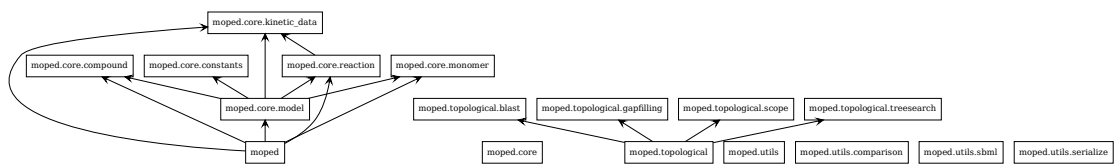

**Figure S1:** UML diagram of core packages in moped

## 4 Extended MEMOTE evaluations for draft model reconstructions, including Unbounded Flux analysis.

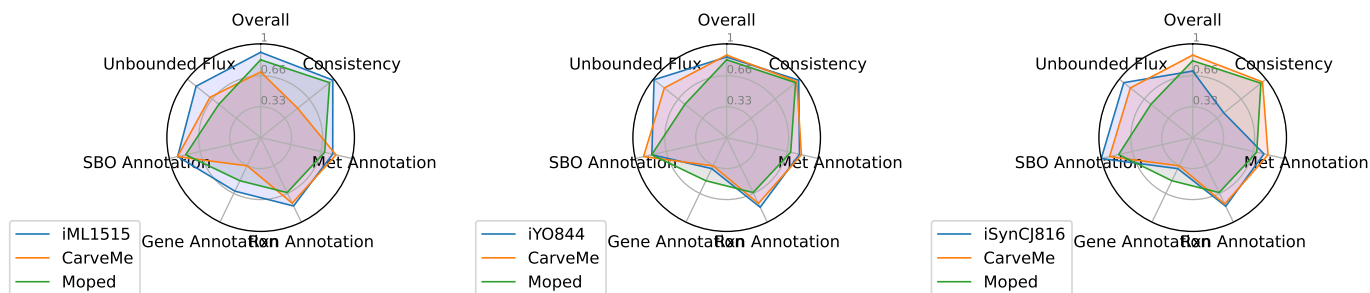

**Figure S2:** Extended MEMOTE evaluations for draft model reconstructions
